# Supplementary material for: Long-Term Nightshift Work and Breast Cancer Risk: An Updated Systematic Review and Meta-Analysis with Special Attention to Menopausal Status and to Recent Nightshift Work
Source: MDPI journal article supplement (doi:10.3390/cancers13235952), 2021-11-26
Supplement: s1 [file s1]

# Supplementary materials: Long-Term Nightshift Work and Breast Cancer Risk: An Updated Systematic Review and Meta-Analysis with Special Attention to Menopausal Status and to Recent Nightshift Work

Christine Schwarz, Ana María Pedraza-Flechas, Roberto Pastor Barriuso, Virginia Lope, Nerea Fernández de Larrea, José Juan Jiménez-Moleón, Marina Pollán and Beatriz Pérez-Gómez

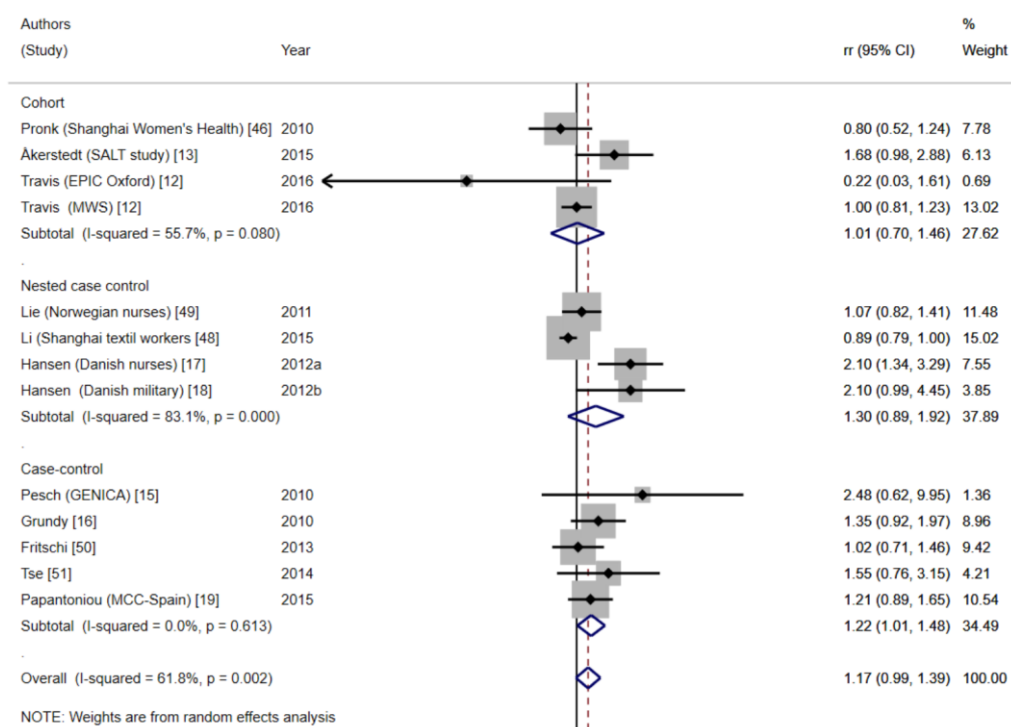

Figure S1. Analysis excluding five studies with uncertain exposure definitions.

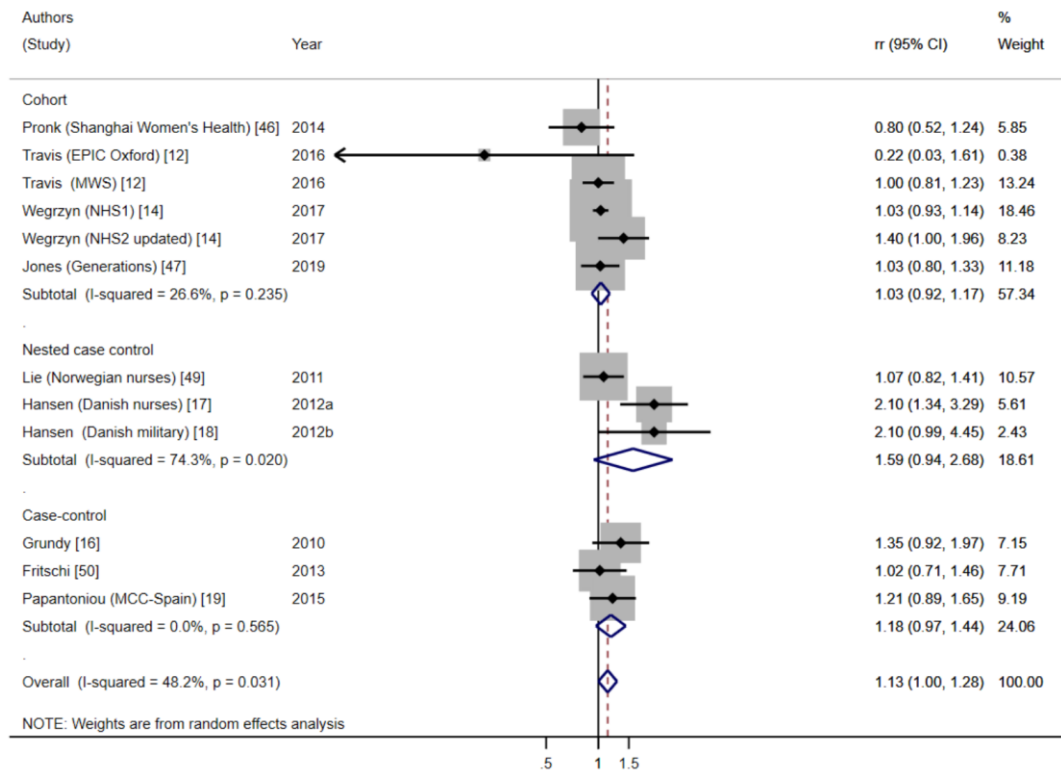

**Figure S2.** Analysis of long-term NSW and BC restricted to those studies that reached at least seven points in the Newcastle Ottawa Scale (NOS  $\geq$  7).

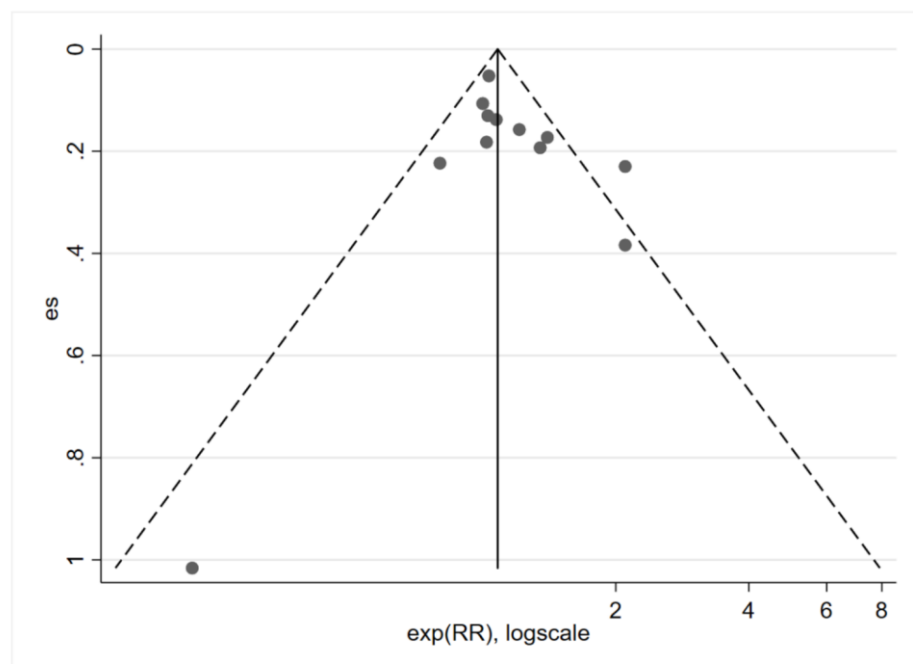

**Figure S3.** Funnel plot limited to studies of high quality (NOS  $\geq$  7).

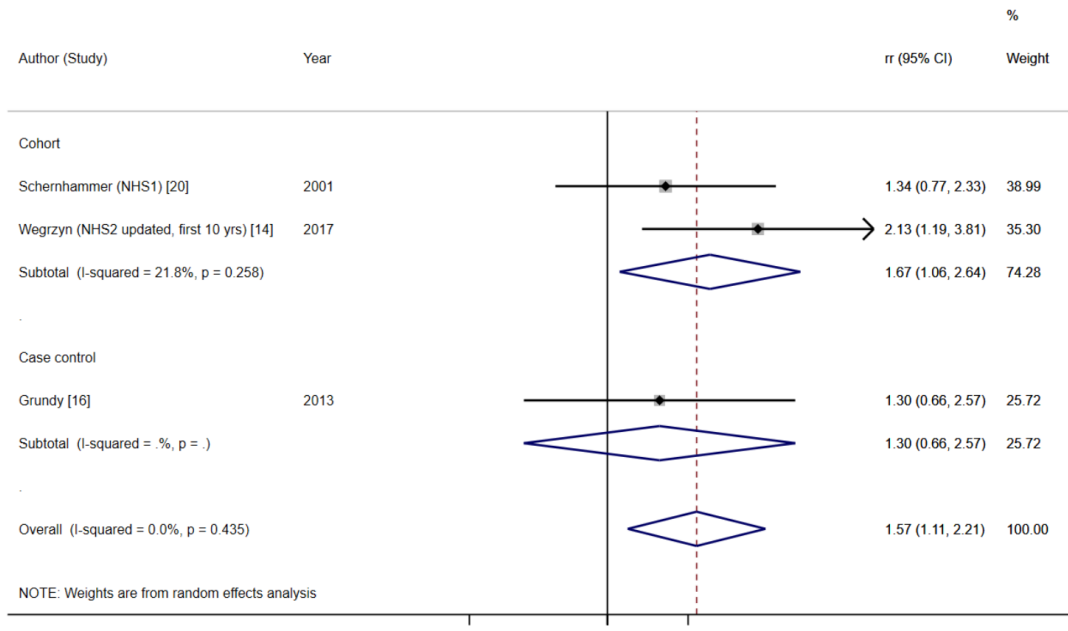

**Figure S4.** Analysis of long-term NSW and premenopausal BC limited to studies of high quality (NOS  $\geq$  7).

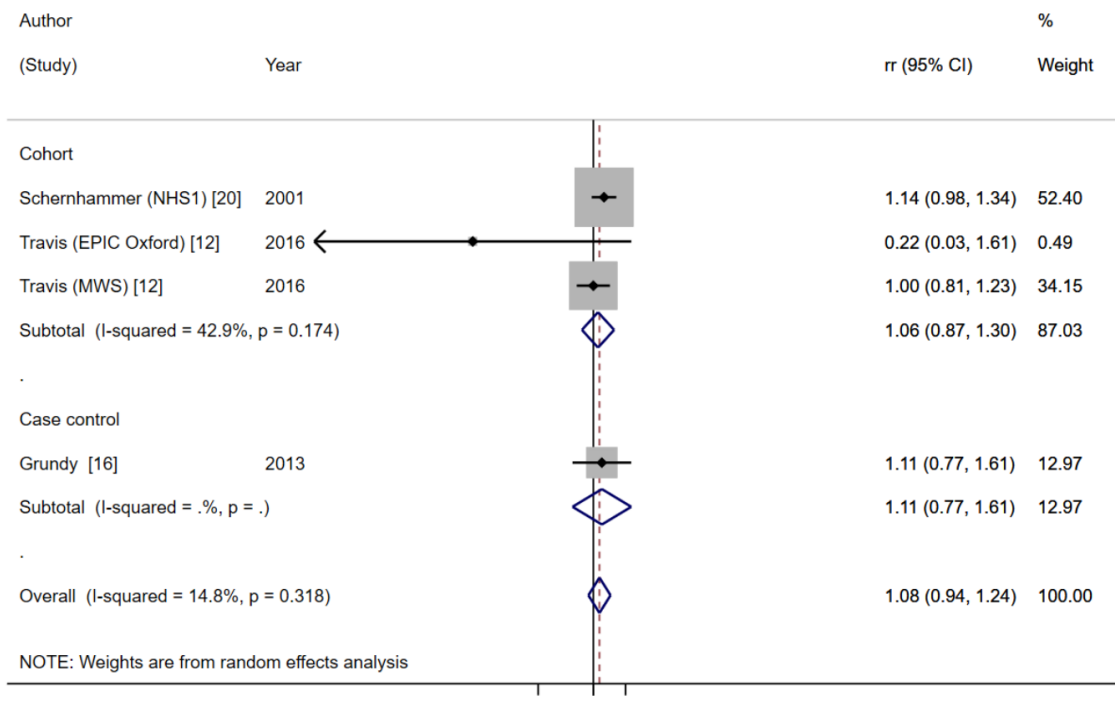

**Figure S5.** Analysis of long-term NSW and postmenopausal BC limited to studies of high quality (NOS  $\geq$  7).

**Table S1.** Results of the risk of bias assessment by the Newcastle-Ottawa Scale.

| Cohort Studies                                      | I. Representativeness/Selection |                                                 |                             |                                   | II. Comparability          | III. Outcome                          |                                        |                                                                     | Q |
|-----------------------------------------------------|---------------------------------|-------------------------------------------------|-----------------------------|-----------------------------------|----------------------------|---------------------------------------|----------------------------------------|---------------------------------------------------------------------|---|
|                                                     | I.1. Exposed cohort             | I.2. Non exposed cohort from the same community | I.3. Exposure Ascertainment | I.4. Outcome not present at start | II. Control of covariables | III.1. Outcome Assessment             | III.2. Follow-up length (>15 yrs)      | III.3. Follow-up adequacy (<15% of difference in lost to follow-up) |   |
| Wegrzyn (2017) NHS I [14]                           |                                 | ⊗                                               | ⊗                           | ⊗                                 | ⊗⊗                         | ⊗                                     | ⊗                                      | ⊗                                                                   | 8 |
| Wegrzyn (2017) NHS II [14]                          |                                 | ⊗                                               | ⊗                           | ⊗                                 | ⊗⊗                         | ⊗                                     | ⊗                                      | ⊗                                                                   | 8 |
| Pronk (2010) SHWS [46]                              | ⊗                               | ⊗                                               | ⊗                           | ⊗                                 | ⊗                          | ⊗                                     | ⊗                                      |                                                                     | 7 |
| Koppes (2014) Dutch Labor Force [22]                | ⊗                               | ⊗                                               |                             | ⊗                                 |                            | ⊗                                     |                                        |                                                                     | 4 |
| Akerstedt (2015) SALT [13]                          | ⊗                               | ⊗                                               | ⊗                           | ⊗                                 | ⊗                          | ⊗                                     |                                        |                                                                     | 6 |
| Travis (2016) EPIC-Oxford [12]                      | ⊗                               | ⊗                                               | ⊗                           | ⊗                                 | ⊗⊗                         | ⊗                                     |                                        |                                                                     | 7 |
| Travis (2016) MWS UK [12]                           | ⊗                               | ⊗                                               | ⊗                           | ⊗                                 | ⊗⊗                         | ⊗                                     |                                        |                                                                     | 7 |
| Jones (2019) Generations Study [47]                 | ⊗                               | ⊗                                               | ⊗                           | ⊗                                 | ⊗⊗                         | ⊗                                     |                                        |                                                                     | 7 |
| <b>Nested case-control and case control studies</b> | <b>I. Selection</b>             |                                                 |                             |                                   | <b>II. Comparability</b>   | <b>III. Ascertainment of exposure</b> |                                        |                                                                     |   |
| Author, study, publication date                     | I.1 Adequate case definition    | I.2 Representativeness of the cases             | I.3 Controls selection      | I.4 Controls definition           | II. Control of covariables | III.1 Exposure ascertainment          | III.2 Same method for cases & controls | III.3 Non-response-rate (<15% of difference)                        | Q |
| <b>Nested case- control studies</b>                 |                                 |                                                 |                             |                                   |                            |                                       |                                        |                                                                     |   |
| Lie (2006) Norwegian nurses [21]                    | ⊗                               |                                                 | ⊗                           | ⊗                                 |                            |                                       | ⊗                                      | ⊗                                                                   | 5 |
| Lie (2011) Norwegian nurses [49]                    | ⊗                               |                                                 | ⊗                           | ⊗                                 | ⊗                          | ⊗                                     | ⊗                                      | ⊗                                                                   | 7 |
| Hansen (2012a) Danish nurses [17]                   | ⊗                               |                                                 | ⊗                           | ⊗                                 | ⊗⊗                         |                                       | ⊗                                      | ⊗                                                                   | 7 |
| Hansen (2012b) Danish military [18]                 | ⊗                               |                                                 | ⊗                           | ⊗                                 | ⊗⊗                         | ⊗                                     | ⊗                                      | ⊗                                                                   | 8 |
| Li (2015) Shanghai textile worker [48]              | ⊗                               |                                                 | ⊗                           | ⊗                                 |                            |                                       | ⊗                                      | ⊗                                                                   | 5 |
| <b>Case- control studies</b>                        |                                 |                                                 |                             |                                   |                            |                                       |                                        |                                                                     |   |
| Pesch (2010) GENICA [15]                            | ⊗                               | ⊗                                               | ⊗                           | ⊗                                 | ⊗                          |                                       | ⊗                                      |                                                                     | 6 |
| Fritschi (2013) BCEES [50]                          | ⊗                               | ⊗                                               | ⊗                           | ⊗                                 | ⊗                          | ⊗                                     | ⊗                                      |                                                                     | 7 |
| Grundy (2013) [16]                                  | ⊗                               | ⊗                                               | ⊗                           | ⊗                                 | ⊗⊗                         |                                       | ⊗                                      | ⊗                                                                   | 8 |
| Tse (2014) [51,55]                                  | ⊗                               | ⊗                                               |                             | ⊗                                 | ⊗                          |                                       | ⊗                                      | ⊗                                                                   | 6 |
| Papantoniou (2015) MCC [19]                         | ⊗                               | ⊗                                               | ⊗                           | ⊗                                 | ⊗⊗                         |                                       | ⊗                                      |                                                                     | 7 |
